# Supplementary material for: Next-generation unnatural monosaccharides reveal that ESRRB O-GlcNAcylation regulates pluripotency of mouse embryonic stem cells
Source: PubMed Central journal article supplement (PMC6731260; doi:10.1038/s41467-019-11942-y), 2019-09-06
Supplement: 41467_2019_11942_MOESM3_ESM.pdf [file 41467_2019_11942_MOESM3_ESM.pdf]

## **Description of Additional Supplementary Files**

**File Name:** Supplementary Data 1

**Description:** Raw data of O-GlcNAz sites identified with 1,3-Ac<sub>2</sub>GalNAz in HeLa cells.

**File Name:** Supplementary Data 2

**Description:** Raw data of S-HexNAz sites identified with 1,3-Ac<sub>2</sub>GalNAz in HeLa cells.

**File Name:** Supplementary Data 3

**Description:** Raw data of S-AcHexNAz sites identified with 1,3-Ac<sub>2</sub>GalNAz in HeLa cells.

**File Name:** Supplementary Data 4

**Description:** Raw data of O-GlcNAz sites identified with 1,3-Pr<sub>2</sub>GalNAz in HeLa cells.

**File Name:** Supplementary Data 5

**Description:** Raw data of S-HexNAz sites identified with 1,3-Pr<sub>2</sub>GalNAz in HeLa cells.

**File Name:** Supplementary Data 6

**Description:** Raw data of S-PrHexNAz sites identified with 1,3-Pr<sub>2</sub>GalNAz in HeLa cells.

**File Name:** Supplementary Data 7

**Description:** Raw data of gene expression analysis in mESCs stably expressing WT and S25A ESRRB by RNA sequencing.
